# Supplementary material for: Hydroxyl free radical route to the stable siliceous Ti-UTL with extra-large pores for oxidative desulfurization
Source: Royal Society of Chemistry journal article supplement (doi:10.1039/c8cc09225g), 2019-01-01
Supplement: c8cc09225g1.pdf [file c8cc09225g1.pdf]

## Electronic Supplementary Information

### **Hydroxyl free radical route to the stable siliceous Ti-UTL with extra-large pores for oxidative desulfurization**

Dier Shi,<sup>a</sup> Le Xu,<sup>\*a</sup> Pohua Chen,<sup>a</sup> Tianqiong Ma,<sup>a</sup> Cong Lin,<sup>a</sup> Xiaoge Wang,<sup>a</sup> Diming Xu,<sup>a</sup> and Junliang Sun<sup>\*a</sup>

College of Chemistry and Molecular Engineering, Peking University, Beijing 100871, China. E-mail: [junliang.sun@pku.edu.cn](mailto:junliang.sun@pku.edu.cn) (J. Sun); [lexu@pku.edu.cn](mailto:lexu@pku.edu.cn) (L. Xu)

## Experimental Section

### Synthesis of Ti-UTL

All the raw materials for the synthesis of Ti-UTL were commercially available. (6R,10S)-6,10-dimethyl-5-azoniaspiro[4.5]decane hydroxide as the structure directing agent (SDA) of Ti-UTL was prepared by the Ref.<sup>1</sup> The Ti-UTL was hydrothermally synthesized from a mixture of fumed silica (Aladdin Industrial Corporation), germanium dioxide (GeO<sub>2</sub>, China Germanium Co. Ltd, 99.999%), titanium butoxide (TBOT, Macklin Co. Ltd), SDA and distilled water. In a typical synthesis, the SDA aqueous solution was diluted with water and GeO<sub>2</sub> were added under stirring. After 20 minutes, the fumed silica was dispersed in the solution under stirring. Then, TBOT (diluted 1:3 with 1-butanol) was added dropwise into the homogeneous solution until the TBOT hydrolysis completely. The molar composition of gel was 0.3 SDA: 0.5 GeO<sub>2</sub>:1 SiO<sub>2</sub>: 0.02 TBOT: 30 H<sub>2</sub>O. Later, the gel was transferred into a 50 ml Teflon-lined autoclave and heated at 448 K for 7 days under stirring. The final product was filtrated, washed with distilled water and ethanol, dried at 353 K for 10 hours. Then, the sample was calcined at 823 K for 12 hours with a temperature ramp of 1°C/min.

### Post-synthesis of calcined Ti-UTL

The post-synthesis treatment conducted under ultraviolet (UV) irradiation is referred to as UV condition, and control experiment conducted without UV irradiation is referred to as dark condition. Besides, the condition of using the H<sub>2</sub>O<sub>2</sub> solution for the generation of ·OH is referred to as H<sub>2</sub>O<sub>2</sub> condition.

Under UV conditions, 0.1 g Ti-UTL zeolites were added into the 6 g distilled water in the quartz Erlenmeyer flask (25 mL) and added a certain amount of tetraethyl orthosilicate (TEOS) which the molar ratio of TEOS and GeO<sub>2</sub> (containing in Ti-UTL) between 1 and 10. Then, the mixture was placed in the UV lamp (irradiance on the mixture: 65.0 mW/cm<sup>2</sup>) with agitation for 3 hours at room temperature. Afterwards, the sample was filtrated, washed with distilled water and ethanol, dried at 353 K for 5 hours. The whole process was repeated once again, and the final products gotten.

Under H<sub>2</sub>O<sub>2</sub> conditions, 0.1 g Ti-UTL zeolites and 60  $\mu$ L 30% H<sub>2</sub>O<sub>2</sub> aqueous solution were added into the 6 g distilled water in the beaker. Then, a certain amount of TEOS ( $n(\text{TEOS})/n(\text{GeO}_2) = 1-10$ ) was added in the solution under agitation for 3 hours at room temperature in the dark box. Afterwards, the sample was filtrated, washed with distilled water and ethanol, dried at 353 K for 5 hours. The whole process was repeated once again, and the final products were gotten.

Under dark conditions, the procedure was the same as the H<sub>2</sub>O<sub>2</sub> condition without adding the H<sub>2</sub>O<sub>2</sub> aqueous solution.

### Post-synthesis Ti-UTL hydrolytic stability test

To verify the stability of post-synthesis Ti-UTL zeolites, the samples were immersed in the 0.2 M HNO<sub>3</sub> aqueous solution with a solid-to-liquid ratio of 1:100 at room temperature for 12 hours as the acid treatment. Then, the products were filtrated, washed with distilled water and ethanol, dried at 353 K for 5 hours. Later, all samples

were calcined at 823 K for 5 hours with a temperature ramp of 2°C/min.

### Catalytic oxidation reactions

The titanosilicate catalysts were all calcined at 823 K for 5 hours before being used in the catalytic reactions. A certain amount of dibenzothiophene (DBT) or dimethyldibenzothiophene (4,6-DMDBT) was dissolved in n-octane to act as a model fuel, and the concentration of reactant was 1000 ug/ml. The oxidations of model fuel were carried out in a 25 ml glass flask equipped with an Allihn condenser under intensive stirring (1000 rpm). In a typical run, 10 mg catalysts, 5 mL model fuel and a suitable amount of *tert*-butylhydroperoxide (TBHP) were mixed in the round-bottomed flask and stirred vigorously at 333 K for 2 hours. The molar ratio of TBHP to sulfide was 5. All reaction mixture was analyzed by GC analysis (Shimadzu GC-2014) to determine the conversion.

### Characterization

Normal powder X-ray diffraction (PXRD) data were obtained by a Rigaku D/max-2000 diffractometer equipped with a graphite monochromator and using a Cu K $\alpha$  ( $\lambda = 1.5418 \text{ \AA}$ ). The data were collected at room temperature over the 3-35° 2 $\theta$  range using a scan speed of 6° min<sup>-1</sup>. The high resolution PXRD data were obtained using a PANalytical Empyrean diffractometer in the transmission mode (Debye-Scherrer geometry). The scan 2 $\theta$  range was from 5° to 100° with a step size of 0.013° and a total data collection time of 12 hours. The solid-state <sup>29</sup>Si MAS NMR spectra were recorded on Bruker AVANCE III 400 MHz WB spectrometer with a Bruker 4 mm MAS probe at a resonance frequency of 79.5 MHz with a spinning rate of 5 kHz, a 90° pulse width of 5  $\mu$ s, and a recycle delay of 100 s. Surface area and pore volume were measured by nitrogen isotherms at 77 K on a Micromeritics ASAP 2020 analyzer after evacuation at 473 K for 8 hours. Inductively coupled plasma (ICP-OES) analyses were carried out on a Leeman Prodigy 7 ICP instrument. The morphology and size of the crystals were examined by a scanning electron microscopy (SEM) using a Hitachi S-4800 field emission scanning electron microscope. The UV-visible diffuse reflectance data were analyzed by a Shimadzu UV3600Plus spectrophotometer. The Fourier transform infrared (FTIR) spectra of zeolites were collected on a VERTEX 80V FT-IR instrument. The products were analyzed by gas chromatography-mass spectrometry (Agilent 5976C GC-MSD) and GC analysis (Shimadzu GC-2014). The EPR spectra were recorded on a Bruker Elexsys E580 spectrometer. General instrument settings were as follows: scanning frequency: 9.85 GHz; central field: 3520 G; scanning width: 100 G; scanning power: 9.5 mW; scanning temperature: 293 K.

DMPO trappings were explained in the following reaction:

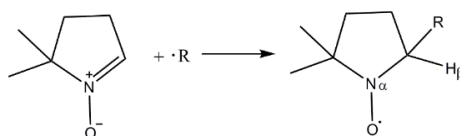

The hyperfine coupling constants (HFCs) of the nitrogen and  $\beta$ -proton ( $a_N$  and  $a_{H\beta}$ ) were given in the main text when referred.

**UV conditions:** 0.05 g Ti-UTL zeolites were added into the 3 g distilled water in the beaker and added 0.1054 g TEOS with agitation. The 200  $\mu$ L of the mixture was added into 200  $\mu$ L of aqueous DMPO solution with the concentration of 80 mM in the quartz cell. The sample was exposed to UV irradiation for one minute before the collection of EPR data.

**H<sub>2</sub>O<sub>2</sub> conditions:** 0.05 g Ti-UTL zeolites, 30  $\mu$ L 30% H<sub>2</sub>O<sub>2</sub> aqueous solution and 0.1054 g TEOS were added into the 3 g distilled water in the beaker with agitation. After 3 h reaction, the 200  $\mu$ L of the mixture was added into 200  $\mu$ L of aqueous DMPO solution with the concentration of 80 mM in the quartz cell. Then, the EPR measurement was started.

**Dark conditions:** the procedure was the same as H<sub>2</sub>O<sub>2</sub> condition without adding H<sub>2</sub>O<sub>2</sub> aqueous solution.

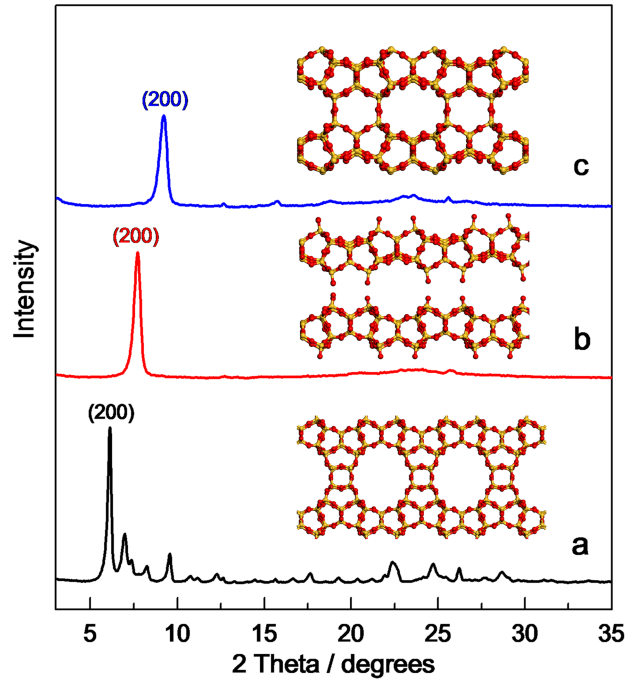

**Fig. S1** Powder XRD patterns of (a) the calcined Ge-rich Ti-UTL, (b) after acid treatment, and (c) after further calcination<sup>a</sup>.

<sup>a</sup> The acid treatment conditions are the same as the stability test.

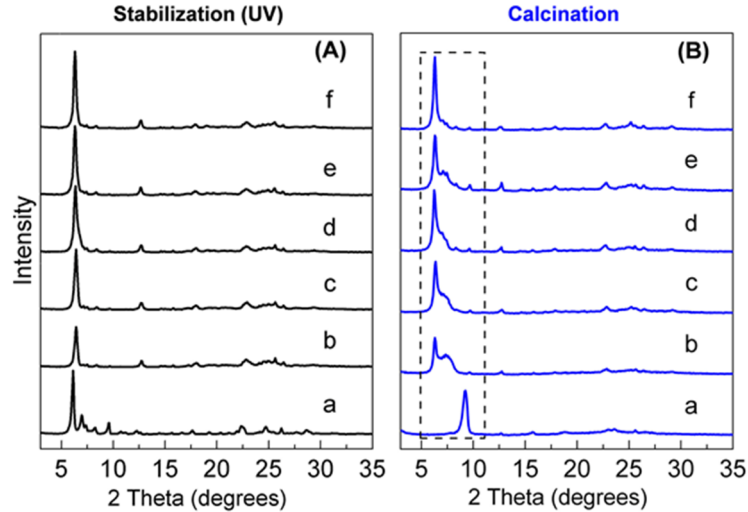

**Fig. S2** PXRD patterns of (A) the parent sample and treated samples with TEOS/GeO<sub>2</sub> molar ratio of 2.5 obtained under UV condition: (a) parent Ti-UTL and stabilization with UV irradiation density of (b) 2, (c) 4, (d) 10, (e) 20 and (f) 30 mW/cm<sup>2</sup>. (B) The PXRD patterns of the parent and treated samples after calcination.

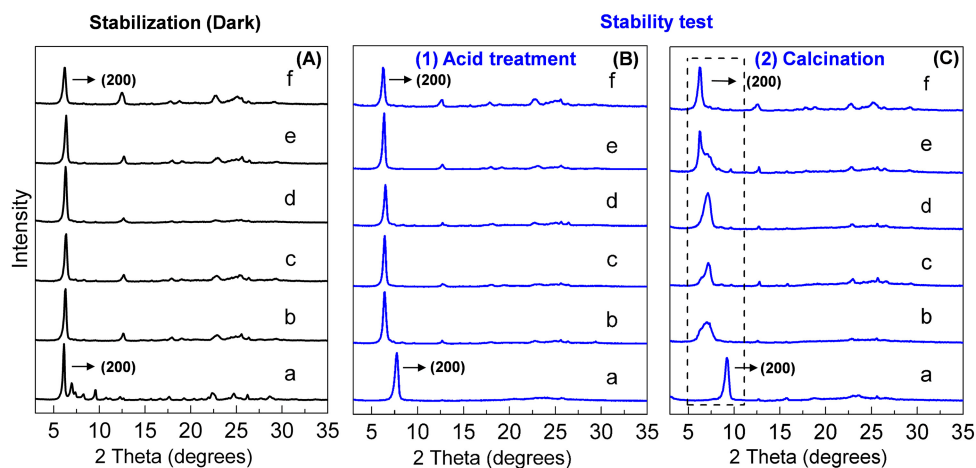

**Fig. S3** XRD patterns of the (A) parent sample and treated samples obtained under dark condition: (a) parent Ti-UTL and stabilization with TEOS/GeO<sub>2</sub> molar ratio of (b) 1, (c) 2, (d) 2.5, (e) 5 and (f) 10. The XRD patterns of the parent and treated samples in stability test upon (B) acid treatment and (C) calcination.

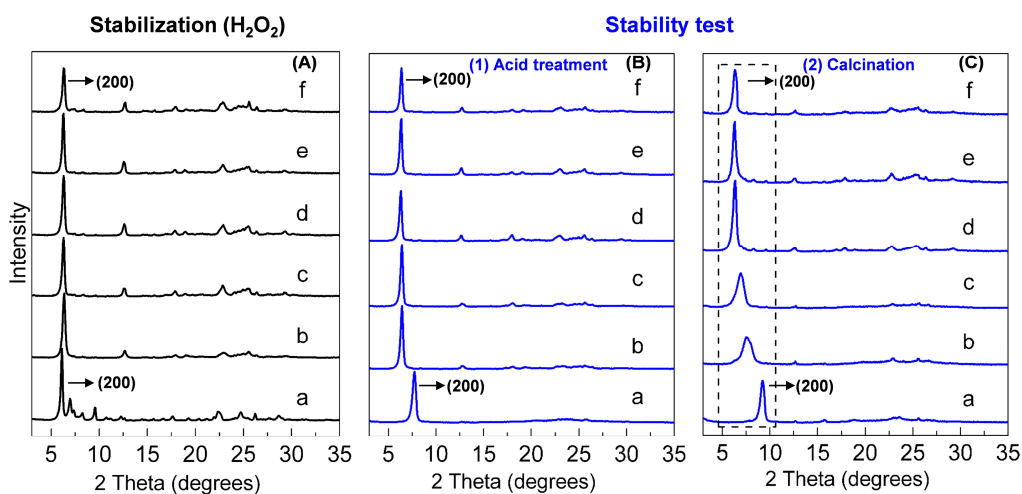

**Fig. S4** XRD patterns of (A) the parent sample and treated samples obtained under H<sub>2</sub>O<sub>2</sub> condition: (a) parent Ti-UTL and stabilization with TEOS/GeO<sub>2</sub> molar ratio of (b) 1, (c) 2, (d) 2.5, (e) 5 and (f) 10. The XRD patterns of the parent and treated samples in stability test upon (B) acid treatment and (C) calcination.

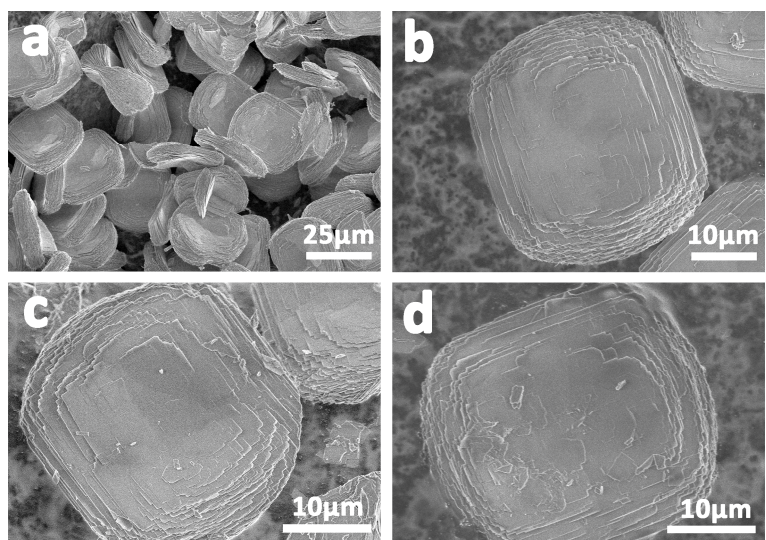

**Fig. S5** SEM images of (a-b) the parent calcined Ti-UTL, the stabilized Ti-UTL with TEOS/GeO<sub>2</sub> molar ratio of 2.5 under (c) UV condition and (d) H<sub>2</sub>O<sub>2</sub> condition.

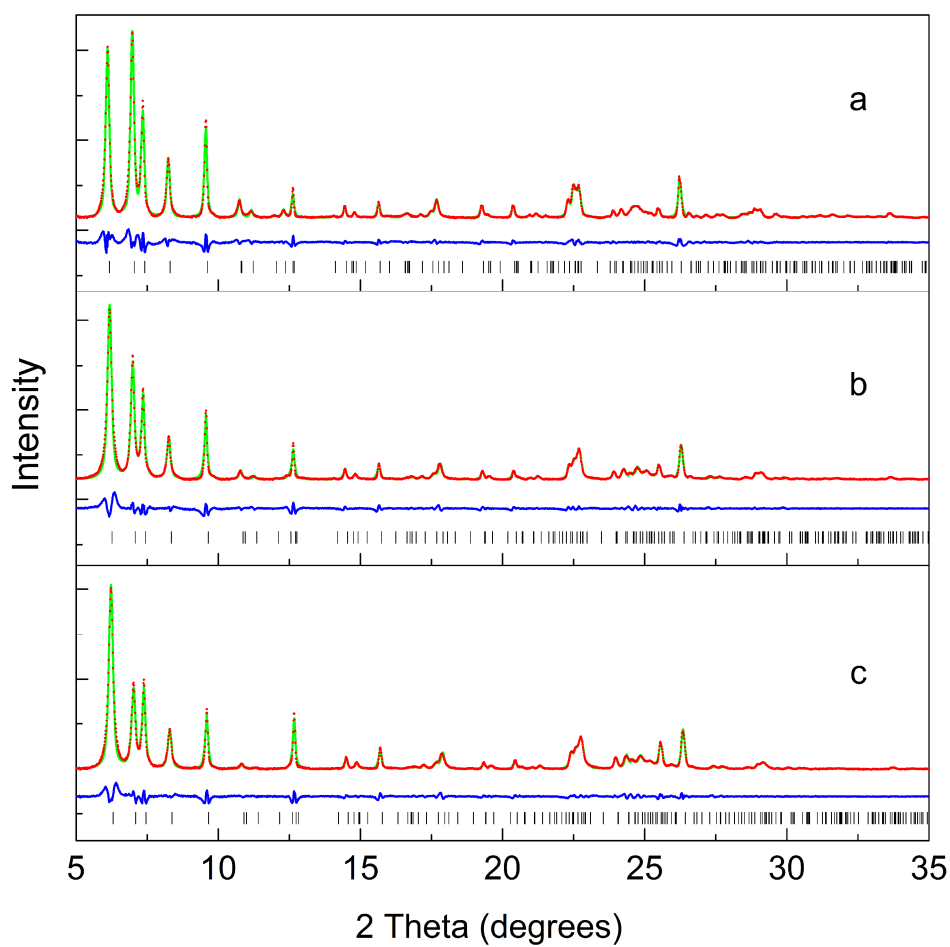

**Fig. S6** The Le Bail fitting of powder X-ray diffraction for (a) the parent calcined Ti-UTL, (b) the stabilized Ti-UTL under  $\text{H}_2\text{O}_2$  condition and (c) the stabilized Ti-UTL under UV condition. Red crosses represent the observed profiles; the green line indicates the simulated profile; the blue curve is the difference profile; the black bars indicate the positions of Bragg peaks.



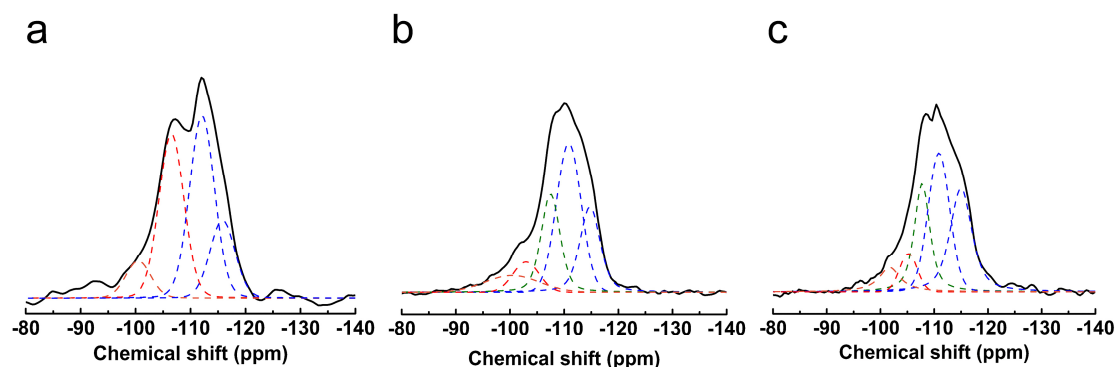

**Fig. S7**  $^{29}\text{Si}$  MAS NMR spectra of (a) the parent calcined Ti-UTL, the stabilized Ti-UTL with TEOS/ $\text{GeO}_2$  molar ratio of 2.5 under (b) UV condition and (c)  $\text{H}_2\text{O}_2$  condition.

The solid-state  $^{29}\text{Si}$  MAS NMR spectra of the UTL zeolites exhibited several signals between  $\delta = -100$  and  $-120$  ppm that represented the different chemical environments of silicon atoms in the framework. For germanosilicate zeolites, it was universally accepted that chemical shifts in the range of  $\delta = -110$  to  $-116$  ppm were assigned to  $\text{Si}(\text{OSi})_4$  ( $\text{Q}^4$ ) sites, those in the range  $\delta = -100$  to  $-110$  ppm were attributed to  $n\text{Si}(4-n)\text{Ge}$  sites and those between  $\delta = -90$  to  $-100$  ppm to  $\text{Si}(\text{OSi})_3(\text{OH})$  ( $\text{Q}^3$ ).<sup>2,3</sup> The resonance peaks at  $-115.8$  ppm and  $-112.0$  ppm in  $^{29}\text{Si}$  MAS NMR spectra of Ti-UTL can be attributed to  $\text{Q}^4$  sites, and those at  $-106.5$  ppm and  $-100.5$  ppm were assigned to  $2\text{Si}2\text{Ge}$  and  $1\text{Si}3\text{Ge}$  sites respectively. As for stabilized Ti-UTL (UV) and Ti-UTL ( $\text{H}_2\text{O}_2$ ), those peaks corresponding to  $(\text{SiO})_n\text{Si}(\text{GeO})_{4-n}$  ( $n=2$  to  $4$ ) sites were decreased due to the dropping out of Ge atoms while the resonance peaks shifted to lower field where the peaks belonging to the Si atoms locating in the *d4r* units, proving the substitution of Si for Ge in the framework during the stabilization process. Hence, signals at  $-107.5$  ppm and  $-107.7$  ppm separately were attributed to the Si atoms in the *d4r* units, which were mainly appearing in the range of  $-107.5$  ppm to  $109.5$  ppm.<sup>2</sup>

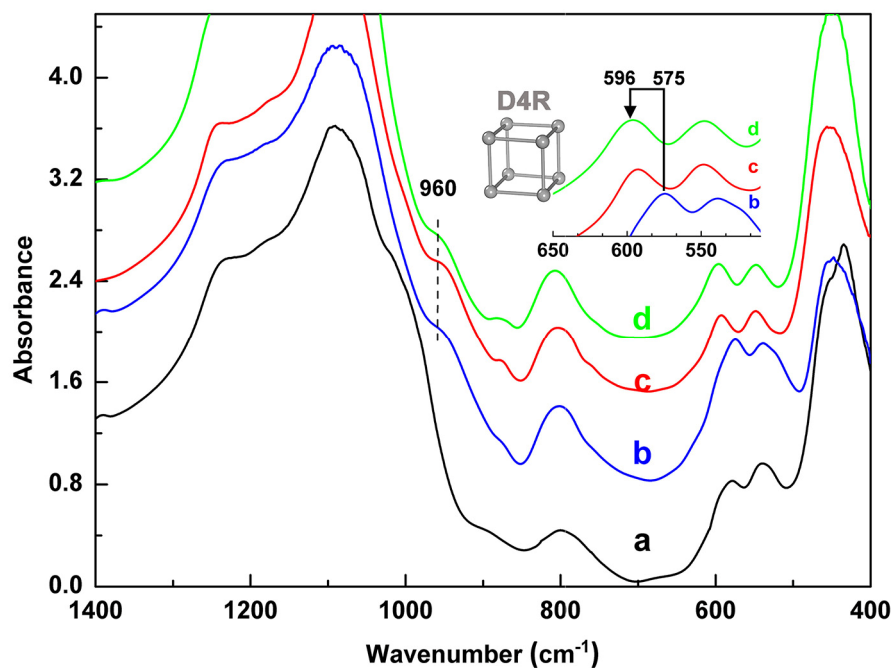

**Fig. S8** FT-IR spectra of calcined (a) Ti-free UTL, (b) the parent Ti-UTL, the stabilized Ti-UTL with TEOS/GeO<sub>2</sub> molar ratio of 2.5 under UV condition (c) and H<sub>2</sub>O<sub>2</sub> condition (d).

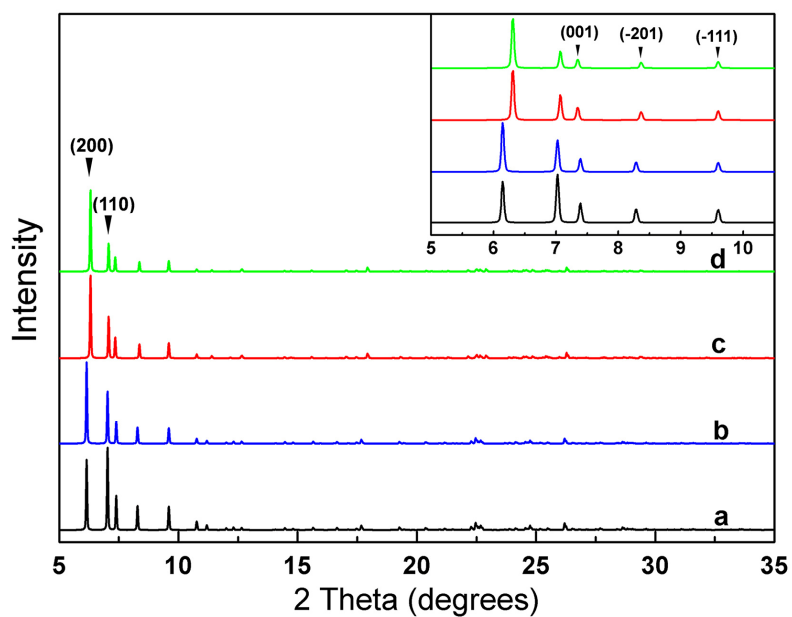

**Fig. S9** Simulated PXRD patterns of Ti-UTL with the *d4r* structural units consisting of (a) 8Ge, (b) 2Si6Ge, (c) 6Si2Ge and (d) 8Si.

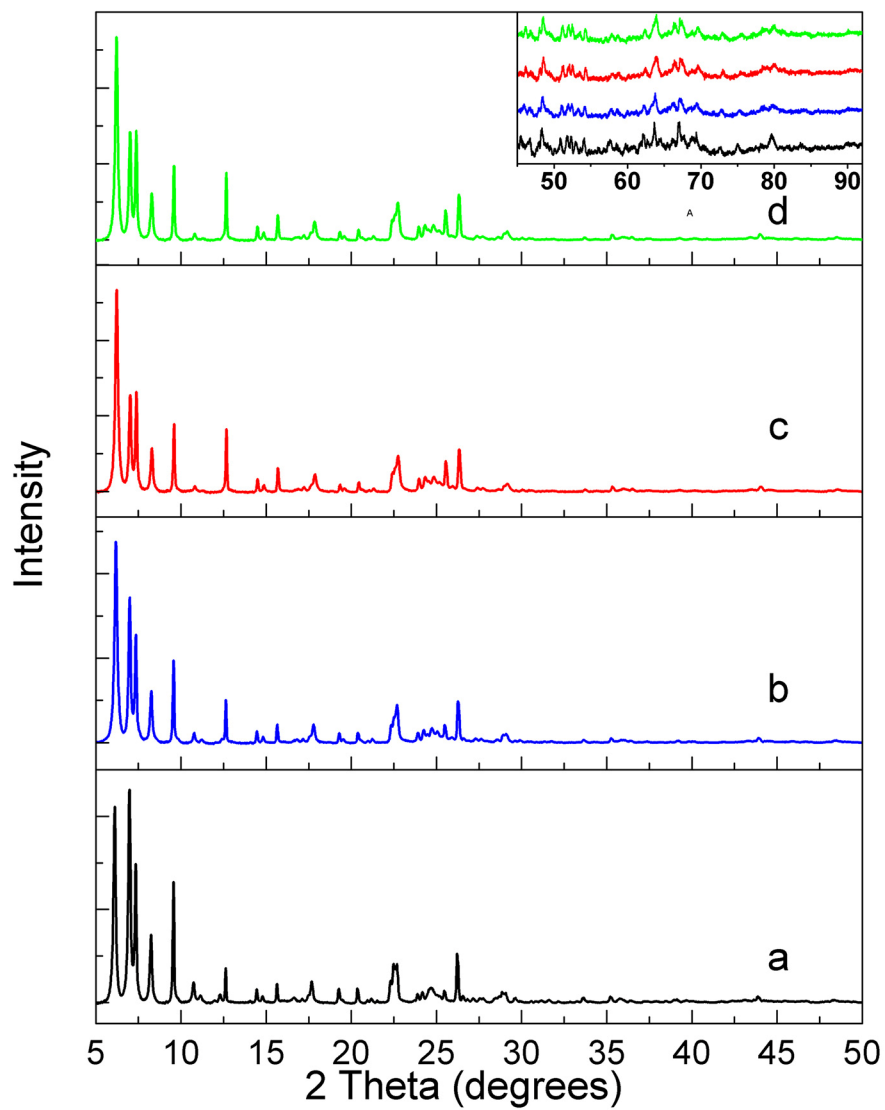

**Fig. S10** PXR D patterns of (a) the parent calcined Ti-UTL, the stabilized Ti-UTL (b) under  $H_2O_2$  condition, (c) under UV condition and (d) under dark condition.

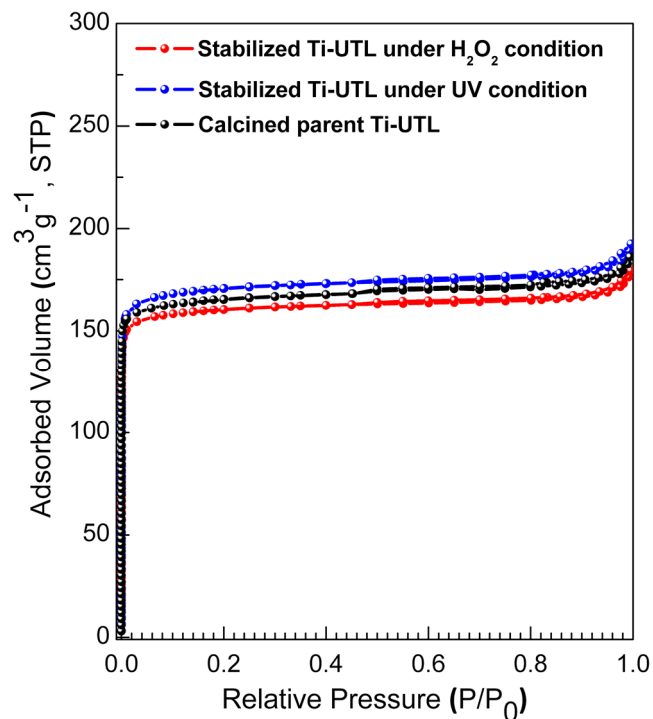

**Fig. S11** N<sub>2</sub> adsorption isotherms measured at 77 K of the parent calcined Ti-UTL, the stabilized Ti-UTL with TEOS/GeO<sub>2</sub> molar ratio of 2.5 under UV condition and H<sub>2</sub>O<sub>2</sub> condition.

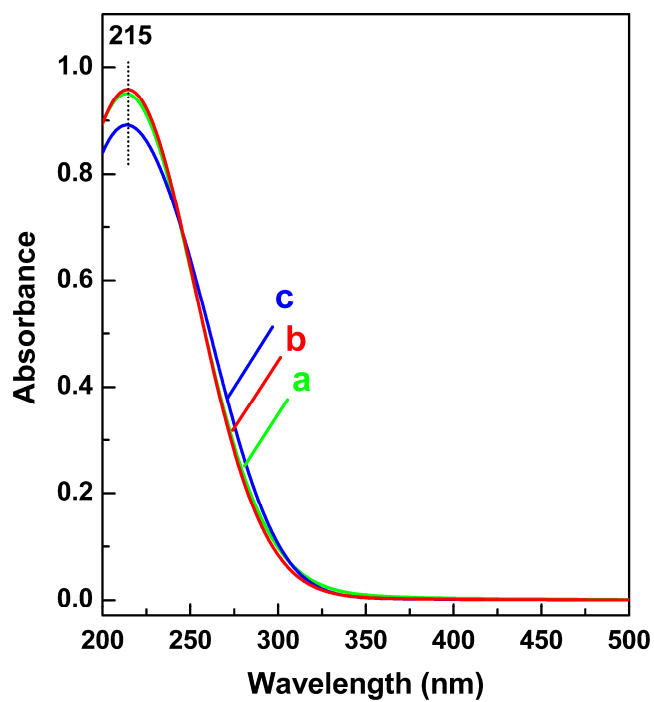

**Fig. S12** UV-vis spectra of (a) the parent calcined Ti-UTL, the stabilized Ti-UTL with TEOS/GeO<sub>2</sub> molar ratio of 2.5 under (b) UV condition and (c) H<sub>2</sub>O<sub>2</sub> condition.

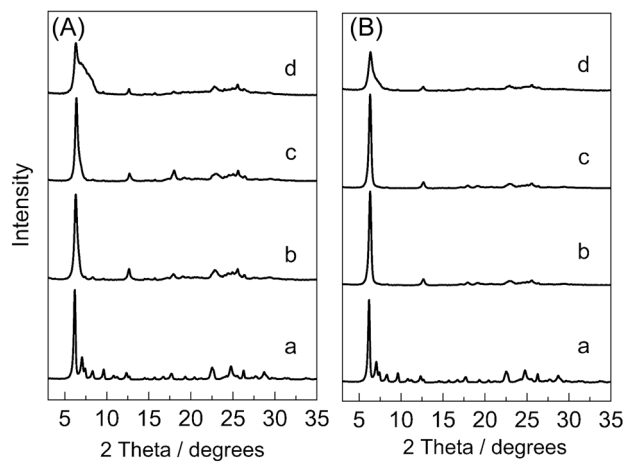

**Fig. S13** PXRD patterns of the samples treated under (A) UV condition and (B)  $H_2O_2$  condition. (a) the parent Ti-UTL, (b) treated with propanetriol, and after stability test including (c) acid washing (d) further calcination.

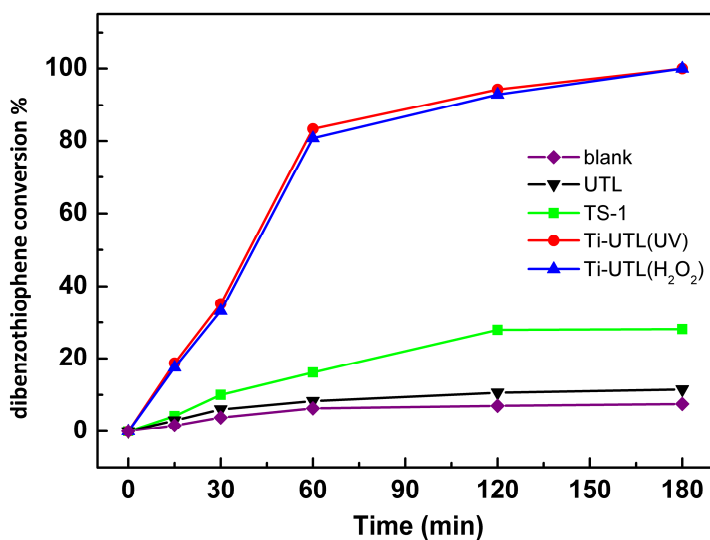

**Fig. S14** Catalytic oxidation of DBT with TBHP over stabilized UTL, TS-1, stabilized Ti-UTL (UV), stabilized Ti-UTL ( $H_2O_2$ ) zeolite catalysts.

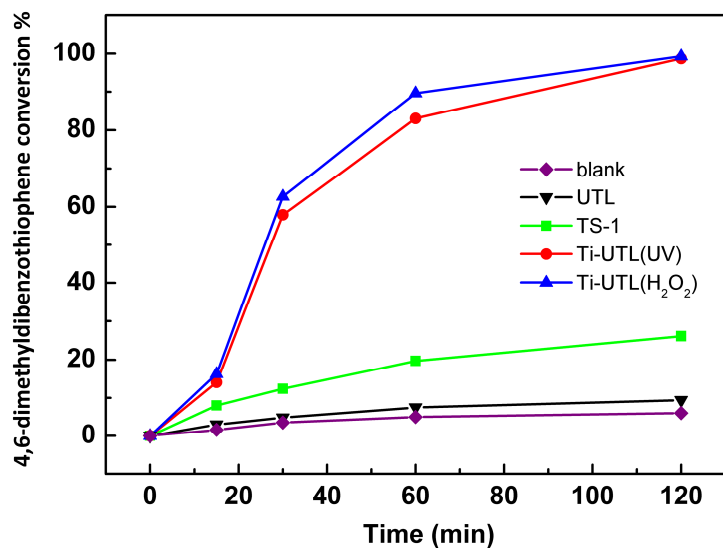

**Fig. S15** Catalytic oxidation of 4,6-DMDBT with TBHP over stabilized UTL, TS-1, stabilized Ti-UTL (UV), stabilized Ti-UTL (H<sub>2</sub>O<sub>2</sub>) zeolite catalysts.

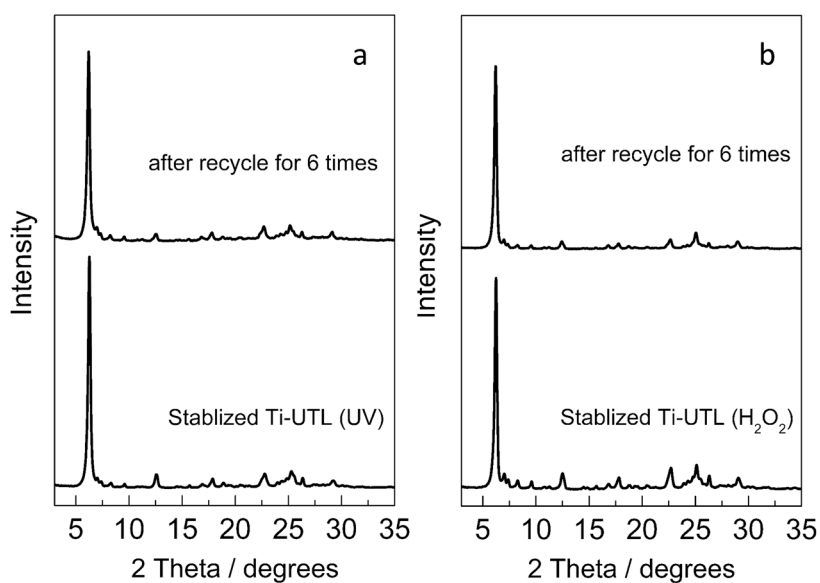

**Fig. S16** PXRD patterns of (a) the fresh and recycled six times of the stabilized Ti-UTL (UV), (b) the fresh and recycled six times of the stabilized Ti-UTL (H<sub>2</sub>O<sub>2</sub>) in the ODS of DBT.

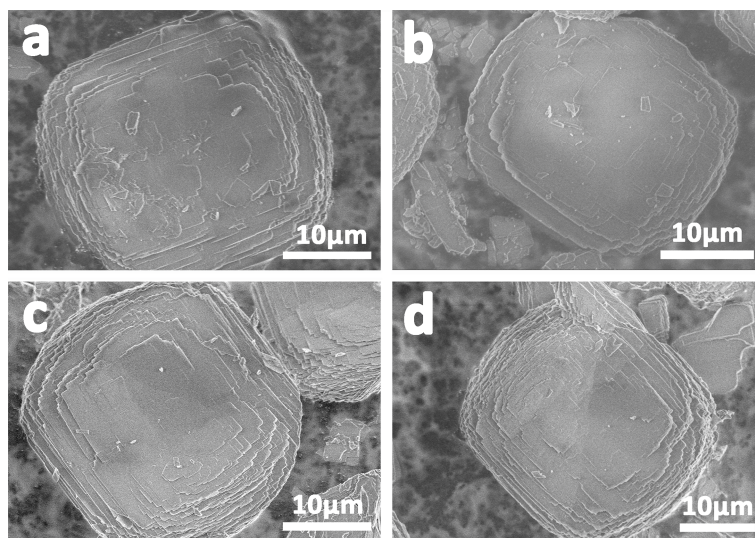

**Fig. S17** SEM images of (a) fresh stabilized Ti-UTL (UV), (b) recycled six times of the stabilized Ti-UTL (UV), (c) fresh stabilized Ti-UTL (H<sub>2</sub>O<sub>2</sub>), (d) recycled six times of the stabilized Ti-UTL (H<sub>2</sub>O<sub>2</sub>).

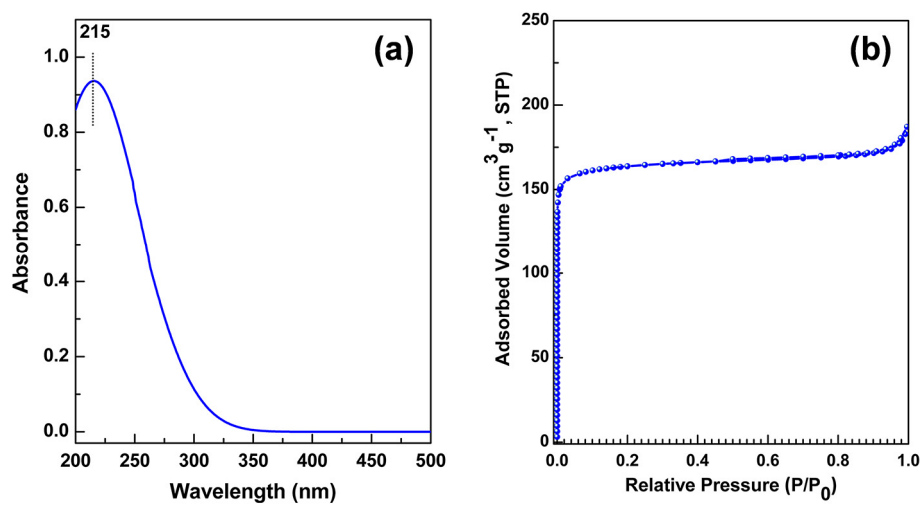

**Fig.S18** (a) UV-vis spectrum and (b) N<sub>2</sub> adsorption isotherms of the stabilized Ti-UTL (UV) after six cycles in the oxidation of DBT.

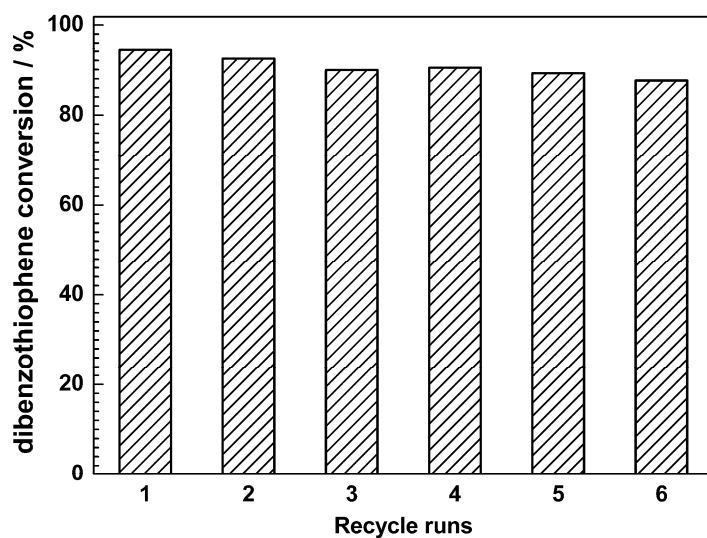

**Fig. S19** Recycle test in the oxidation of DBT with TBHP over the stabilized Ti-UTL zeolite catalysts (stabilized with UV irradiation).

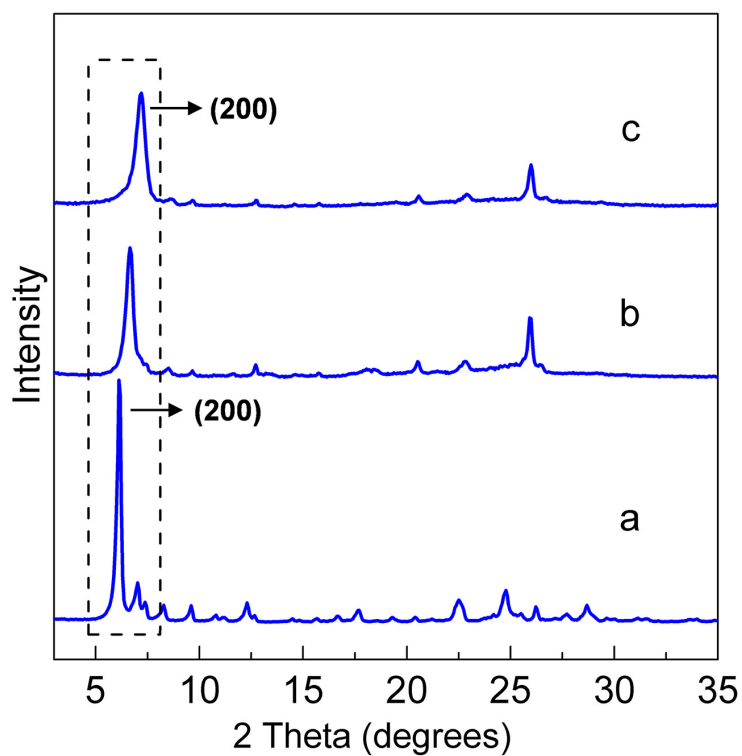

**Fig. S20** PXRD patterns of (a) the parent Ti-UTL without stabilization, (b) after catalytic oxidation of DBT and (c) further calcination.



**Table S1.** Physiochemical property of the parent and the stabilized Ti-UTL.

| Sample                                  | $S_{\text{BET}}^a$<br>[m <sup>2</sup> g <sup>-1</sup> ] | $S_{\text{ext}}^b$<br>[m <sup>2</sup> g <sup>-1</sup> ] | $S_{\text{micro}}^c$<br>[m <sup>2</sup> g <sup>-1</sup> ] | $V_{\text{micro}}^b$<br>[cm <sup>3</sup> g <sup>-1</sup> ] | $V_{\text{pore}}^d$<br>[cm <sup>3</sup> g <sup>-1</sup> ] |
|-----------------------------------------|---------------------------------------------------------|---------------------------------------------------------|-----------------------------------------------------------|------------------------------------------------------------|-----------------------------------------------------------|
| Ti-UTL                                  | 556                                                     | 54                                                      | 502                                                       | 0.23                                                       | 0.28                                                      |
| Ti-UTL (H <sub>2</sub> O <sub>2</sub> ) | 539                                                     | 47                                                      | 492                                                       | 0.23                                                       | 0.27                                                      |
| Ti-UTL (UV)                             | 571                                                     | 57                                                      | 514                                                       | 0.24                                                       | 0.29                                                      |

<sup>a</sup> The surface area was calculated by BET method. <sup>b</sup> The micropore volume and external surface area were calculated by *t*-Plot method. <sup>c</sup> The micropore surface area was calculated by the equation of  $S_{\text{micro}} = S_{\text{BET}} - S_{\text{exter}}$ . <sup>d</sup> The total pore volume was calculated by the adsorption data at  $P/P_0 = 0.974$ .

**Table S2.** Oxidative desulfurization of DBT and 4,6-DMDBT over various titanosilicate<sup>a</sup>.

| Catalyst | Si/Ti <sup>b</sup> | Sulfur compound | Conv. (%) <sup>c</sup> |
|----------|--------------------|-----------------|------------------------|
| Ti-Beta  | 52                 | DBT             | 96.2                   |
|          |                    | 4,6-DMDBT       | 68.4                   |
| Ti-MWW   | 40                 | DBT             | 100                    |
|          |                    | 4,6-DMDBT       | 100                    |

<sup>a</sup> Reaction conditions: 5 mL 1000 ug/mL model fuels, 60°C, 10 mg catalysts, 30 uL 65% TBHP. <sup>b</sup> Measured by inductively coupled plasma (ICP). <sup>c</sup> After 2 hours of the catalytic reaction.

**Table S3.** The element analyses of the stabilized Ti-UTL (UV) after recycle test.

| Sample                       | Si/Ge <sup>b</sup> | Si/Ti <sup>b</sup> |
|------------------------------|--------------------|--------------------|
| Ti-UTL (UV)                  | 30.1               | 119.2              |
| Ti-UTL (UV&six) <sup>a</sup> | 30.1               | 121.6              |

<sup>a</sup> the stabilized Ti-UTL (UV) after six cycles in the oxidation of DBT.

<sup>b</sup> Measured by inductively coupled plasma (ICP).

**Table S4.** Oxidative desulfurization of DBT over Ti-UTL without stabilization<sup>a</sup>.

| Samples                    | Si/Ge <sup>d</sup> | Si/Ti <sup>d</sup> | Conv. (%)        |                  |
|----------------------------|--------------------|--------------------|------------------|------------------|
|                            |                    |                    | DBT <sup>e</sup> | TON <sup>f</sup> |
| Ti-UTL <sup>b</sup>        | 3.9                | 105                | 42.1             | 10.1             |
| Ti-UTL (Cat.) <sup>c</sup> | 4.5                | 106                | —                | —                |

<sup>a</sup> Reaction conditions: 5 mL 1000 ug/mL model fuels, 60°C, 10 mg catalysts, 30 uL 65% TBHP. <sup>b</sup> the parent Ti-UTL without stabilization. <sup>c</sup> the parent Ti-UTL after catalytic oxidation of DBT. <sup>d</sup> Measured by inductively coupled plasma (ICP). <sup>e</sup> After 2 h of the catalytic reaction. <sup>f</sup> Turnover number (moles of converted DBT /mole of Ti sites).

## Reference

- 1 O. V. Shvets, N. Kasian, A. t. Zukal, J. i. Pinkas and J. i. Čejka, *Chem. Mater.*, 2010, **22**, 3482-3495.
- 2 H. Xu, J.-g. Jiang, B. Yang, L. Zhang, M. He and P. Wu, *Angew. Chem. Int. Ed.*, 2013, **53**, 1355-1359.
- 3 W. H. Fu, Z. Yuan, Z. Wang, Y. Wang, W. Yang and M. Y. He, *Dalton Trans*, 2017, **46**, 6692-6699.
